# Supplementary material for: Introducing a new index of CBDC development
Source: Research Square preprint supplement (doi:10.21203/rs.3.rs-7435011/v1), 2025-09-02
Supplement: Supplementary file 1 [file 0b2d2a7426ea51ec7f42d5b8.docx]

**Appendix**

Table A1. The literature on CBDC and Cryptocurrency market: A brief review

| **No.** | **Study** | **Time** | **Methodology** | **Main findings** |
| --- | --- | --- | --- | --- |
| 1 | Li et al. (2022) | Jan2012-Feb2022 for the case of China | - Use text analysis to construct a CBDC signals from 1000 articles related to CBDC from Baidu - Calculate a stock index of the fintech sector (55 stocks) - TVP-VAR | - Fintech stock responses positively to CBDC signals - The responses are decreased overtime |
| 2 | Mzoughi et al. (2022) | 2020-2021 | - Event study - The launch of the Bahamas CBDC (SANDDollar) in December 31, 2020 and the Nigeria CBDC (eNaira) in October 25, 2021 | - Abnormal and accumulated abnormal returns of Bitcoin on the event days are negative (but statistical insignificance) - The reactions of Bitcoin to Bahamas CBDC are stronger than Nigeria CBDC |
| 3 | Akin et al. (2023) | August 01, 2017 to April 01, 2022 | - DCC-GARCH - CBDC uncertainty index and CBDC attention index from Wang et al. (2022) (they use multiple search from LexisNexis News & Business database) | - CBDC uncertainty/attention indices => (+) volatility of Bitcoin returns |
| 4 | Ayadi et al. (2023) | May 17, 2019– December 31, 2021 | - Cross-Quantilogram model - CBDC uncertainty index and CBDC attention index from Wang et al. (2022) - Weekly closing prices of the top cryptocurrencies and stable coins: Bitcoin, Ethereum, Tether, Binance, USD Coin, XRP, Terra and Dai | - CBDC uncertainty index is negatively associated with returns of all coins - CBDC attention index is negatively associated with returns of Bitcoin, Ethereum, XPR and Terra USD and is positively associated with returns of Tether, Binance, USD Coin and Dai |
| 5 | Copestake et al. (2023) | November 2016-December 2021 | - Crypto trading volume - Crypto bans and policy statements related to CBDC (from Auer et al. (2020): this data bases on speeches by central bank governors and board members to classify them into positive, neutral or negative: a speech is assigned a value of: −1 if it has a clear negative viewpoint on CBDCs or explicitly states that there is no plan at present to issue a CBDC; +1 if a speech is clearly positive in tone, or announces that a project or pilot has been launched or is in the pipeline; and 0 otherwise). - the local projection method | - A crypto ban => (–) trading volume - A CBDC-supportive speech => (+) trading volume |
| 6 | Helmi et al. (2023) | January 2015 - December 2021 | - TVP-VAR - Weekly data - CBDC uncertainty index, cryptocurrency policy uncertainty index, S&P 500 index, VIX, Bitcoin price | - CBDC uncertainty and VIX shocks account for most of variances in Bitcoin return shocks and cryptocurrency uncertainty, especially during the COVID-19 period |
| 7 | Ozili (2023) |  | - Discourse analysis and literature review | - Issuance of CBDC might cause demise of digital currencies such as Bitcoin - As the power of monetary authorizer, central bank would create CBDC and reduce confidence in cryptocurrencies |
| 8 | Wang et al. (2023) | April 6, 2020, to July  18, 2022 | - TVP-VAR - CBDC attention index - Weekly data - Ten largest market capitalization by the end of July 2022: Bitcoin, Ethereum, Tether, USD coin, BNB, XPR, Binance, Cardano, Solana, and Dogecoin | - CBDC attention has significant impacts on cryptocurrency market (price) - CBDC attention has significant impacts on price volatility of Bitcoin and Ethereum - Bitcoin and Ethereum are main risk volatility spillover transmitters. CBDC attention, Bitcoin, and Ethereum have net pairwise directional spillovers - Binance, Tether, and USD coin are primary spillover receivers - Short-term total spillover index is smaller than that of the long-term total spillover index |
| 9 | Yousaf and Goodell (2023) | November 20, 2015 - December 30, 2022 | - CBDC uncertainty index, cryptocurrency policy uncertainty index, cryptocurrency price uncertainty index - Weekly data - Digital payment stocks - TVP-VAR | - CBDC uncertainty is a net recipient - Cryptocurrency policy uncertainty and cryptocurrency price uncertainty are net transmitters |
| 10 | Bas et al. (2024) | 2020-2022 | - VAR - CBDC index from Wang et al. (2022) - Financial conditions, systematic risk, TED spread, VIX, exchange rate, Twitter-based Economic Uncertainty, Geopolitical Risk Index, prices of Bitcoin, Ethereum, Ripple, Litecoin, Dash, Nem, Stellar, and Monero. | - A weak positive connectedness among CBDC index and cryptocurrency prices |

*Notes*:

- CBDC: Central Bank Digital Currency; VIX: The Chicago Board Options Exchange's CBOE Volatility Index
- TVP-VAR: Time Varying Parameter Vector Autoregression model; DCC-GARCH: the dynamic conditional correlation-generalized autoregressive conditional heteroskedasticity model; TED spread is the difference between 3-Month LIBOR based on US dollars (USD3MTD156N) and 3-Month Treasury Bill (see https://fred.stlouisfed.org/series/TEDRATE)

Table A2. List of countries in building CBDC Development indices

| Algeria | Armenia | Argentina | Aruba | Australia |
| --- | --- | --- | --- | --- |
| Azerbaijan | Bahamas | Bharain | Bangladesh | Belraus |
| Bhutan | Boswana | Brazil | Canada | Chile |
| China | Colombia | Costa Rica | Cote d'Ivoire | Curacao |
| Dominican Repulic | Ecuador | Egypt | Eswatini | Ethiopia |
| Euro Area* | Fiji | Georgia | Ghana | Guatemala |
| Haiti | Honduras | Hongkong | Iceland | India |
| Indonesia | Iran | Iraq | Isarel | Jamaica |
| Japan | Jordan | Kazakhstan | Kyrgyzstan | Kenya |
| Kuwait | Laos | Lebanon | Madagascar | Malawi |
| Malaysia | Maldives | Mauritania | Mauritius | Mexico |
| Mongolia | Montenegro | Morocco | Namibia | Nepal |
| New Zealand | Nigeria | Norway | Oman | Pakistan |
| Papua New Guinea | Paraguay | Peru | Philippines | Qatar |
| Republic of Palau | Russian Federation | Rwanda | Saudi Arabia | Singapore |
| Solomon Islands | South Africa | South Korea | Sri Lanka | Sudan |
| Switzerland | Tanzania | Thailand | Tonga | Trinidad and Tobago |
| Tunisia | Turkey | Uganda | Ukraine | United Arab Emirates |
| United Kingdom | United States of America | Uruguay | Vanuatu | Vietnam |
| Yemen | Zambia | Zimbabwe | |  |

*Notes*: *: in the case of Euro Area, we collect information about CBDC project of European Central Bank (ECB) in representing for CBDC of all 27 European members.

Table A3. Data description

| Variable | Definition | Obs | Mean | Std. | Min | Max |
| --- | --- | --- | --- | --- | --- | --- |
| CBDCDIE | CBDC equal-weighted Development index | 120 | 3.94 | 1.25 | 1.41 | 5.43 |
| CBDCDIG | CBDC GDP-weighted Development index | 120 | 4.85 | 0.70 | 3.41 | 5.63 |
| CBDCUI | CBDC Uncertainty index | 120 | 4.61 | 0.02 | 4.60 | 4.66 |
| CBDCAI | CBDC Attention index | 120 | 4.61 | 0.01 | 4.60 | 4.65 |
| GVolum | Global cryptocurrency market trading volume | 120 | 26.96 | 2.26 | 21.26 | 29.75 |
| GMarkcap | Global cryptocurrency market capitalization | 120 | 26.17 | 2.10 | 22.05 | 28.93 |
| Coin | Price of cryptocurrency | | | | | |
|  | Bitcoin | 120 | 8.88 | 1.79 | 5.41 | 11.48 |
|  | Doge | 120 | -5.08 | 2.59 | -9.22 | -0.86 |
|  | Ethereum | 112 | 5.81 | 2.22 | -0.38 | 8.44 |
|  | Litecoin | 120 | 3.62 | 1.43 | 0.35 | 5.60 |
|  | Monero | 120 | 3.77 | 2.08 | -1.19 | 6.05 |
|  | Stellar | 120 | -3.05 | 1.85 | -6.64 | -0.63 |
|  | Tether | 116 | 0.00 | 0.01 | -0.07 | 0.03 |
|  | XRP | 120 | -1.76 | 1.80 | -5.50 | 0.84 |
| Coin | Price volatility of cryptocurrency | | | | | |
|  | Bitcoin | 120 | -3.50 | 0.44 | -4.46 | -2.36 |
|  | Doge | 120 | -3.13 | 0.61 | -4.46 | -1.15 |
|  | Ethereum | 112 | -3.14 | 0.44 | -4.18 | -2.09 |
|  | Litecoin | 120 | -3.17 | 0.51 | -4.78 | -1.99 |
|  | Monero | 120 | -3.12 | 0.54 | -4.49 | -1.85 |
|  | Stellar | 120 | -3.04 | 0.60 | -4.56 | -0.73 |
|  | Tether | 109 | -7.41 | 5.07 | -34.90 | -1.70 |
|  | XRP | 120 | -3.17 | 0.56 | -4.27 | -1.60 |
| Coin | Trading volume of cryptocurrency | | | | | |
|  | Bitcoin | 120 | 26.02 | 2.03 | 21.02 | 28.54 |
|  | Doge | 120 | 20.91 | 3.64 | 13.69 | 26.84 |
|  | Ethereum | 112 | 24.97 | 2.93 | 16.47 | 28.36 |
|  | Litecoin | 120 | 23.48 | 1.69 | 18.20 | 26.41 |
|  | Monero | 120 | 20.58 | 2.90 | 13.34 | 23.94 |
|  | Stellar | 120 | 20.28 | 3.89 | 11.01 | 25.05 |
|  | Tether | 118 | 24.24 | 5.10 | 12.54 | 29.29 |
|  | XRP | 120 | 22.85 | 3.25 | 16.12 | 26.88 |
| Coin | Market capitalization of cryptocurrency | | | | | |
|  | Bitcoin | 120 | 25.59 | 1.89 | 21.90 | 28.30 |
|  | Doge | 120 | 20.49 | 2.70 | 16.21 | 24.77 |
|  | Ethereum | 112 | 24.32 | 2.33 | 17.70 | 26.99 |
|  | Litecoin | 120 | 21.55 | 1.61 | 17.85 | 23.60 |
|  | Monero | 120 | 20.36 | 2.29 | 14.42 | 22.56 |
|  | Stellar | 120 | 20.47 | 2.42 | 15.96 | 23.27 |
|  | Tether | 118 | 21.48 | 4.12 | 12.42 | 25.65 |
|  | XRP | 120 | 22.74 | 1.93 | 18.81 | 25.61 |

*Notes*:

- All variables are taken in log forms
- All data are formed in monthly basic
- Data of CBDC Development indices are built by authors
- Data of CBDC Uncertainty and Attention indices are collected from <https://sites.google.com/view/cryptocurrency-indices/the-indices/cbdc-indices>
- Data of cryptocurrency market are collected from <https://www.coingecko.com/en/global-charts>
- Data of each cryptocurrency are collected from https://www.coingecko.com/
- Price of cryptocurrency is closing price at the beginning day of each month of each cryptocurrency
- Price volatility is monthly standard deviation of daily return of each cryptocurrency
- Trading volume is total monthly trading value of each cryptocurrency
- Market capitalization is monthly mean market capitalization of each cryptocurrency

Table A4. Stationary tests, Granger causality tests, and Cointegration tests for CBDC Development Indices and Prices of seven largest cryptocurrencies

| **Part A: Stationary tests** | | | | | | | | | | | | | | | |
| --- | --- | --- | --- | --- | --- | --- | --- | --- | --- | --- | --- | --- | --- | --- | --- |
| **Variables (prices of cryptocurrency in log form)** | | | | | | | | **Dicky-Fuller unit root test** | | | | | | | |
| **Level** | | | **1st difference** | | **Conclusions** | | |
| Bitcoin | | | | | | | | -1.013 | | | -9.840*** | | Stationary at 1st difference | | |
| Doge | | | | | | | | -0.671 | | | -9.890*** | | Stationary at 1st difference | | |
| Ethereum | | | | | | | | -2.419 | | | -8.814*** | | Stationary at 1st difference | | |
| Litecoin | | | | | | | | -1.746 | | | -9.130*** | | Stationary at 1st difference | | |
| Monero | | | | | | | | -2.161 | | | -12.06*** | | Stationary at 1st difference | | |
| Stellar | | | | | | | | -1.231 | | | -9.733*** | | Stationary at 1st difference | | |
| Tether | | | | | | | | -13.48*** | | | -18.64*** | | Stationary at level | | |
| XRP | | | | | | | | -1.220 | | | -11.62*** | | Stationary at 1st difference | | |
| **Part B: Granger causality tests** | | | | | | | | | | | | | | | |
| Variable: **X (prices of coin in log form)** | | **CBDCDIE** does not Granger-cause **X** | | | **CBDCDIG** does not Granger-cause **X** | | | | **X** does not Granger-cause **CBDCDIE** | | | | | **X** does not Granger-cause **CBDCDIG** | |
| Chi2 statistic | | p-value | Chi2 statistic | | p-value | | Chi2 statistic | | | p-value | | Chi2 statistic | p-value |
| Bitcoin | | 1.983 | | 0.371 | 9.389*** | | 0.009 | | 5.970* | | | 0.051 | | 0.950 | 0.622 |
| Doge | | 4.115 | | 0.128 | 12.06*** | | 0.002 | | 2.888 | | | 0.236 | | 0.748 | 0.688 |
| Ethereum | | 10.01*** | | 0.007 | 15.62*** | | 0.000 | | 4.992* | | | 0.082 | | 4.522 | 0.104 |
| Litecoin | | 1.554 | | 0.460 | 4.824* | | 0.090 | | 2.602 | | | 0.272 | | 1.144 | 0.564 |
| Monero | | 0.114 | | 0.944 | 1.013 | | 0.602 | | 4.301 | | | 0.116 | | 3.479 | 0.176 |
| Stellar | | 2.875 | | 0.238 | 6.611** | | 0.037 | | 1.444 | | | 0.486 | | 4.502 | 0.105 |
| Tether | | 1.249 | | 0.535 | 0.151 | | 0.927 | | 3.967 | | | 0.138 | | 0.178 | 0.915 |
| XRP | | 4.675* | | 0.097 | 10.55*** | | 0.005 | | 0.700 | | | 0.705 | | 2.524 | 0.283 |
| **Part C: Cointegration tests** | | | | | | | | | | | | | | | |
| Variable: **X (prices of coin in log form)** | Maximum rank | | Cointegration test of CBDC equal-weighted development index (CBDCDIE) with X | | | | | | | Cointegration test of CBDC GDP-weighted development index (CBDCDIG) with X | | | | | |
| Trace statistics | | | 5% critical value | | | | Trace statistics | | | 5% critical value | | |
| Bitcoin | 0 | | 17.45** | | | 15.41 | | | | 15.84** | | | 15.41 | | |
| 1 | | 3.585 | | | 3.76 | | | | 3.873** | | | 3.76 | | |
| Doge | 0 | | 15.98** | | | 15.41 | | | | 15.89** | | | 15.41 | | |
| 1 | | 2.889** | | | 3.76 | | | | 3.568 | | | 3.76 | | |
| Ethereum | 0 | | 21.14** | | | 15.41 | | | | 28.39** | | | 15.41 | | |
| 1 | | 9.724** | | | 3.76 | | | | 4.662** | | | 3.76 | | |
| Litecoin | 0 | | 15.24 | | | 15.41 | | | | 11.47 | | | 15.41 | | |
| 1 | | 5.603 | | | 3.76 | | | | 3.93**9** | | | 3.76 | | |
| Monero | 0 | | 16.62** | | | 15.41 | | | | 11.43 | | | 15.41 | | |
| 1 | | 4.183** | | | 3.76 | | | | 4.002 | | | 3.76 | | |
| Stellar | 0 | | 13.90 | | | 15.41 | | | | 12.25 | | | 15.41 | | |
| 1 | | 3.849 | | | 3.76 | | | | 3.918 | | | 3.76 | | |
| Tether | 0 | | 92.80** | | | 15.41 | | | | 86.85** | | | 15.41 | | |
| 1 | | 7.029** | | | 3.76 | | | | 3.266 | | | 3.76 | | |
| XRP | 0 | | 13.75 | | | 15.41 | | | | 15.41** | | | 15.41 | | |
| 1 | | 3.648 | | | 3.76 | | | | 3.819** | | | 3.76 | | |

*Notes*: All variables are taking logarithm; Stationary is tested by the Augmented Dickey-Fuller unit-root test; Granger causality is tested by the Granger causality Wald tests; Cointegration is tested by the Johansen tests for cointegration; *, **, *** are significant levels at 10%, 5%, 1%, respectively.

Table A5. Stationary tests, Granger causality tests, and Cointegration tests for CBDC Development Indices and Price volatilities of seven largest cryptocurrencies

| **Part A: Stationary tests** | | | | | | | | | | | | | | | |
| --- | --- | --- | --- | --- | --- | --- | --- | --- | --- | --- | --- | --- | --- | --- | --- |
| **Variables (Price volatility of cryptocurrency in log form)** | | | | | | | | **Dicky-Fuller unit root test** | | | | | | | |
| **Level** | | | **1st difference** | | **Conclusions** | | |
| Bitcoin | | | | | | | | -7.784*** | | | -17.76*** | | Stationary at level | | |
| Doge | | | | | | | | -6.625*** | | | -16.60*** | | Stationary at level | | |
| Ethereum | | | | | | | | -5.913*** | | | -15.83*** | | Stationary at level | | |
| Litecoin | | | | | | | | -6.819*** | | | -15.31*** | | Stationary at level | | |
| Monero | | | | | | | | -6.227*** | | | -17.69*** | | Stationary at level | | |
| Stellar | | | | | | | | -6.875*** | | | -15.64*** | | Stationary at level | | |
| Tether | | | | | | | | -5.800*** | | | -15.37*** | | Stationary at level | | |
| XRP | | | | | | | | -6.464*** | | | -14.26*** | | Stationary at level | | |
| **Part B: Granger causality tests** | | | | | | | | | | | | | | | |
| Variable: **X (Price volatility of coin in log form)** | | **CBDCDIE** does not Granger-cause **X** | | | **CBDCDIG** does not Granger-cause **X** | | | | **X** does not Granger-cause **CBDCDIE** | | | | | **X** does not Granger-cause **CBDCDIG** | |
| Chi2 statistic | | p-value | Chi2 statistic | | p-value | | Chi2 statistic | | | p-value | | Chi2 statistic | p-value |
| Bitcoin | | 0.035 | | 0.982 | 0.902 | | 0.637 | | 2.878 | | | 0.237 | | 1.560 | 0.458 |
| Doge | | 0.196 | | 0.906 | 2.897 | | 0.235 | | 8.183 | | | 0.017 | | 4.913* | 0.086 |
| Ethereum | | 13.09*** | | 0.001 | 7.690** | | 0.021 | | 1.556 | | | 0.459 | | 6.833** | 0.033 |
| Litecoin | | 1.517 | | 0.468 | 2.483 | | 0.289 | | 5.068* | | | 0.079 | | 9.391*** | 0.009 |
| Monero | | 9.480*** | | 0.009 | 6.916** | | 0.031 | | 0.611 | | | 0.736 | | 0.257 | 0.879 |
| Stellar | | 9.946*** | | 0.007 | 7.021** | | 0.030 | | 0.438 | | | 0.803 | | 1.898 | 0.387 |
| Tether | | 16.19*** | | 0.000 | 4.116 | | 0.128 | | 8.642** | | | 0.013 | | 1.982 | 0.371 |
| XRP | | 1.821 | | 0.402 | 2.134 | | 0.344 | | 3.704 | | | 0.157 | | 1.477 | 0.478 |
| **Part C: Cointegration tests** | | | | | | | | | | | | | | | |
| Variable: **X (Price volatility of coin in log form)** | Maximum rank | | Cointegration test of CBDC equal-weighted development index (CBDCDIE) with X | | | | | | | Cointegration test of CBDC GDP-weighted development index (CBDCDIG) with X | | | | | |
| Trace statistics | | | 5% critical value | | | | Trace statistics | | | 5% critical value | | |
| Bitcoin | 0 | | 35.38** | | | 15.41 | | | | 29.14** | | | 15.41 | | |
| 1 | | 6.336** | | | 3.76 | | | | 4.117** | | | 3.76 | | |
| Doge | 0 | | 30.37** | | | 15.41 | | | | 26.83** | | | 15.41 | | |
| 1 | | 7.377** | | | 3.76 | | | | 3.896** | | | 3.76 | | |
| Ethereum | 0 | | 40.17** | | | 15.41 | | | | 34.27** | | | 15.41 | | |
| 1 | | 9.788** | | | 3.76 | | | | 4.407** | | | 3.76 | | |
| Litecoin | 0 | | 31.51** | | | 15.41 | | | | 30.37** | | | 15.41 | | |
| 1 | | 8.247** | | | 3.76 | | | | 4.090** | | | 3.76 | | |
| Monero | 0 | | 32.47** | | | 15.41 | | | | 25.32** | | | 15.41 | | |
| 1 | | 7.142** | | | 3.76 | | | | 3.822** | | | 3.76 | | |
| Stellar | 0 | | 41.87** | | | 15.41 | | | | 34.62** | | | 15.41 | | |
| 1 | | 7.548** | | | 3.76 | | | | 15.41** | | | 3.76 | | |
| Tether | 0 | |  | | | 15.41 | | | |  | | | 15.41 | | |
| 1 | |  | | | 3.76 | | | |  | | | 3.76 | | |
| XRP | 0 | | 36.11** | | | 15.41 | | | | 32.86** | | | 15.41 | | |
| 1 | | 7.702** | | | 3.76 | | | | 3.732** | | | 3.76 | | |

*Notes*: Price volatility is standard deviation of daily price return within a month; All variables are taking logarithm; Stationary is tested by the Augmented Dickey-Fuller unit-root test; Granger causality is tested by the Granger causality Wald tests; Cointegration is tested by the Johansen tests for cointegration; in the case of Tether, there is gap in series thus cointegration test can not be performed; *, **, *** are significant levels at 10%, 5%, 1%, respectively.

Table A6. Stationary tests, Granger causality tests, and Cointegration tests for CBDC Development Indices and Trading volume of seven largest cryptocurrencies

| **Part A: Stationary tests** | | | | | | | | | | | | | | | |
| --- | --- | --- | --- | --- | --- | --- | --- | --- | --- | --- | --- | --- | --- | --- | --- |
| **Variables (Trading volume of cryptocurrency in log form)** | | | | | | | | **Dicky-Fuller unit root test** | | | | | | | |
| **Level** | | | **1st difference** | | **Conclusions** | | |
| Bitcoin | | | | | | | | -1.771 | | | -10.40*** | | Stationary at 1st difference | | |
| Doge | | | | | | | | -1.153 | | | -11.01*** | | Stationary at 1st difference | | |
| Ethereum | | | | | | | | -2.949** | | | -10.47*** | | Stationary at level | | |
| Litecoin | | | | | | | | -2.814* | | | -10.56*** | | Stationary at level | | |
| Monero | | | | | | | | -2.511 | | | -11.37*** | | Stationary at 1st difference | | |
| Stellar | | | | | | | | -1.552 | | | -12.50*** | | Stationary at 1st difference | | |
| Tether | | | | | | | | -2.176 | | | -8.729*** | | Stationary at 1st difference | | |
| XRP | | | | | | | | -1.380 | | | -11.77*** | | Stationary at 1st difference | | |
| **Part B: Granger causality tests** | | | | | | | | | | | | | | | |
| Variable: **X (Trading volume of coin in log form)** | | **CBDCDIE** does not Granger-cause **X** | | | **CBDCDIG** does not Granger-cause **X** | | | | **X** does not Granger-cause **CBDCDIE** | | | | | **X** does not Granger-cause **CBDCDIG** | |
| Chi2 statistic | | p-value | Chi2 statistic | | p-value | | Chi2 statistic | | | p-value | | Chi2 statistic | p-value |
| Bitcoin | | 8.416** | | 0.015 | 27.72 | | 0.000 | | 2.811 | | | 0.245 | | 6.854 | 0.032 |
| Doge | | 12.03*** | | 0.002 | 25.74 | | 0.000 | | 7.371** | | | 0.025 | | 2.582 | 0.275 |
| Ethereum | | 4.609* | | 0.100 | 6.069 | | 0.048 | | 3.549 | | | 0.170 | | 0.081 | 0.960 |
| Litecoin | | 11.83*** | | 0.003 | 32.44 | | 0.000 | | 0.994 | | | 0.608 | | 1.476 | 0.478 |
| Monero | | 0.262 | | 0.877 | 1.103 | | 0.576 | | 1.294 | | | 0.523 | | 1.346 | 0.510 |
| Stellar | | 0.968 | | 0.616 | 5.666 | | 0.059 | | 6.396** | | | 0.041 | | 3.068 | 0.216 |
| Tether | | 4.213 | | 0.122 | 5.517 | | 0.063 | | 2.404 | | | 0.301 | | 2.116 | 0.347 |
| XRP | | 2.765 | | 0.251 | 11.59 | | 0.003 | | 2.162 | | | 0.339 | | 1.071 | 0.585 |
| **Part C: Cointegration tests** | | | | | | | | | | | | | | | |
| Variable: **X (Trading volume of coin in log form)** | Maximum rank | | Cointegration test of CBDC equal-weighted development index (CBDCDIE) with X | | | | | | | Cointegration test of CBDC GDP-weighted development index (CBDCDIG) with X | | | | | |
| Trace statistics | | | 5% critical value | | | | Trace statistics | | | 5% critical value | | |
| Bitcoin | 0 | | 20.83** | | | 15.41 | | | | 17.08** | | | 15.41 | | |
| 1 | | 9.383** | | | 3.76 | | | | 5.742** | | | 3.76 | | |
| Doge | 0 | | 23.25** | | | 15.41 | | | | 28.04** | | | 15.41 | | |
| 1 | | 7.307** | | | 3.76 | | | | 4.103** | | | 3.76 | | |
| Ethereum | 0 | | 16.22** | | | 15.41 | | | | 18.91** | | | 15.41 | | |
| 1 | | 4.448** | | | 3.76 | | | | 2.978** | | | 3.76 | | |
| Litecoin | 0 | | 21.81** | | | 15.41 | | | | 20.16** | | | 15.41 | | |
| 1 | | 6.093** | | | 3.76 | | | | 4.049** | | | 3.76 | | |
| Monero | 0 | | 14.59 | | | 15.41 | | | | 12.34 | | | 15.41 | | |
| 1 | | 4.657 | | | 3.76 | | | | 4.669 | | | 3.76 | | |
| Stellar | 0 | | 12.11 | | | 15.41 | | | | 10.18 | | | 15.41 | | |
| 1 | | 3.578 | | | 3.76 | | | | 3.807 | | | 3.76 | | |
| Tether | 0 | | 17.32** | | | 15.41 | | | | 13.39 | | | 15.41 | | |
| 1 | | 7.176** | | | 3.76 | | | | 4.454 | | | 3.76 | | |
| XRP | 0 | | 13.97 | | | 15.41 | | | | 15.02 | | | 15.41 | | |
| 1 | | 4.487 | | | 3.76 | | | | 4.158 | | | 3.76 | | |

*Notes*: Trading volume is total trading volume in a month of each coin; All variables are taking logarithm; Stationary is tested by the Augmented Dickey-Fuller unit-root test; Granger causality is tested by the Granger causality Wald tests; Cointegration is tested by the Johansen tests for cointegration; *, **, *** are significant levels at 10%, 5%, 1%, respectively.

Table A7. Stationary tests, Granger causality tests, and Cointegration tests for CBDC Development Indices and Market capitalization of seven largest cryptocurrencies

| **Part A: Stationary tests** | | | | | | | | | | | | | | | |
| --- | --- | --- | --- | --- | --- | --- | --- | --- | --- | --- | --- | --- | --- | --- | --- |
| **Variables (Market capitalization of cryptocurrency in log form)** | | | | | | | | **Dicky-Fuller unit root test** | | | | | | | |
| **Level** | | | **1st difference** | | **Conclusions** | | |
| Bitcoin | | | | | | | | -1.336 | | | -7.325*** | | Stationary at 1st difference | | |
| Doge | | | | | | | | -0.626 | | | -7.493*** | | Stationary at 1st difference | | |
| Ethereum | | | | | | | | -3.013** | | | -7.372*** | | Stationary at level | | |
| Litecoin | | | | | | | | -2.131 | | | -7.419*** | | Stationary at 1st difference | | |
| Monero | | | | | | | | -3.172** | | | -9.252*** | | Stationary at level | | |
| Stellar | | | | | | | | -1.186 | | | -7.515*** | | Stationary at 1st difference | | |
| Tether | | | | | | | | -4.443*** | | | -5.794*** | | Stationary at level | | |
| XRP | | | | | | | | -0.894 | | | -7.431*** | | Stationary at 1st difference | | |
| **Part B: Granger causality tests** | | | | | | | | | | | | | | | |
| Variable: **X (Market capitalization of coin in log form)** | | **CBDCDIE** does not Granger-cause **X** | | | **CBDCDIG** does not Granger-cause **X** | | | | **X** does not Granger-cause **CBDCDIE** | | | | | **X** does not Granger-cause **CBDCDIG** | |
| Chi2 statistic | | p-value | Chi2 statistic | | p-value | | Chi2 statistic | | | p-value | | Chi2 statistic | p-value |
| Bitcoin | | 3.650 | | 0.161 | 11.81*** | | 0.003 | | 6.397** | | | 0.041 | | 1.403 | 0.496 |
| Doge | | 6.449** | | 0.040 | 18.42*** | | 0.000 | | 2.631 | | | 0.268 | | 0.204 | 0.903 |
| Ethereum | | 12.58*** | | 0.002 | 18.44*** | | 0.000 | | 0.919 | | | 0.632 | | 2.628 | 0.269 |
| Litecoin | | 2.120 | | 0.346 | 7.647** | | 0.022 | | 1.476 | | | 0.478 | | 0.100 | 0.951 |
| Monero | | 0.314 | | 0.855 | 0.527 | | 0.768 | | 3.186 | | | 0.203 | | 1.603 | 0.449 |
| Stellar | | 2.486 | | 0.289 | 10.01*** | | 0.007 | | 0.923 | | | 0.630 | | 0.048 | 0.976 |
| Tether | | 0.297 | | 0.862 | 5.278* | | 0.071 | | 7.456** | | | 0.024 | | 10.06*** | 0.007 |
| XRP | | 4.964* | | 0.084 | 16.23*** | | 0.000 | | 0.684 | | | 0.710 | | 1.830 | 0.400 |
| **Part C: Cointegration tests** | | | | | | | | | | | | | | | |
| Variable: **X (Market capitalization of coin in log form)** | Maximum rank | | Cointegration test of CBDC equal-weighted development index (CBDCDIE) with X | | | | | | | Cointegration test of CBDC GDP-weighted development index (CBDCDIG) with X | | | | | |
| Trace statistics | | | 5% critical value | | | | Trace statistics | | | 5% critical value | | |
| Bitcoin | 0 | | 19.15** | | | 15.41 | | | | 18.55** | | | 15.41 | | |
| 1 | | 4.806** | | | 3.76 | | | | 3.920** | | | 3.76 | | |
| Doge | 0 | | 17.99** | | | 15.41 | | | | 20.89** | | | 15.41 | | |
| 1 | | 4.355** | | | 3.76 | | | | 3.836** | | | 3.76 | | |
| Ethereum | 0 | | 22.36** | | | 15.41 | | | | 30.84** | | | 15.41 | | |
| 1 | | 9.693** | | | 3.76 | | | | 4.341** | | | 3.76 | | |
| Litecoin | 0 | | 15.75** | | | 15.41 | | | | 15.40 | | | 15.41 | | |
| 1 | | 6.385** | | | 3.76 | | | | 3.308 | | | 3.76 | | |
| Monero | 0 | | 19.24** | | | 15.41 | | | | 14.61 | | | 15.41 | | |
| 1 | | 5.162** | | | 3.76 | | | | 4.024** | | | 3.76 | | |
| Stellar | 0 | | 13.84 | | | 15.41 | | | | 14.71 | | | 15.41 | | |
| 1 | | 4.667 | | | 3.76 | | | | 3.725 | | | 3.76 | | |
| Tether | 0 | | 22.98** | | | 15.41 | | | | 21.28** | | | 15.41 | | |
| 1 | | 6.516** | | | 3.76 | | | | 5.842** | | | 3.76 | | |
| XRP | 0 | | 16.13** | | | 15.41 | | | | 20.25** | | | 15.41 | | |
| 1 | | 4.731** | | | 3.76 | | | | 3.831** | | | 3.76 | | |

*Notes*: Market capitalization is the mean of market capitalization in a month of each coin; All variables are taking logarithm; Stationary is tested by the Augmented Dickey-Fuller unit-root test; Granger causality is tested by the Granger causality Wald tests; Cointegration is tested by the Johansen tests for cointegration; *, **, *** are significant levels at 10%, 5%, 1%, respectively.

**References**

Akin, I., Khan, M. Z., Hameed, A., Chebbi, K., & Satiroglu, H. (2023). The ripple effects of CBDC-related news on Bitcoin returns: Insights from the DCC-GARCH model. *Research in International Business and Finance*, *66*, 102060. <https://doi.org/https://doi.org/10.1016/j.ribaf.2023.102060>

Auer, R., Cornelli, G., & Frost, J. (2020). Rise of the central bank digital currencies: drivers, approaches and technologies. *CEPR Discussion Paper*, *No. DP15363*. <https://ssrn.com/abstract=3723552>

Ayadi, A., Ghabri, Y., & Guesmi, K. (2023). Directional predictability from central bank digital currency to cryptocurrencies and stablecoins. *Research in International Business and Finance*, *65*, 101909. <https://doi.org/https://doi.org/10.1016/j.ribaf.2023.101909>

Bas, T., Malki, I., & Sivaprasad, S. (2024). Connectedness between central bank digital currency index, financial stability and digital assets. *Journal of International Financial Markets, Institutions and Money*, *92*, 101981. <https://doi.org/https://doi.org/10.1016/j.intfin.2024.101981>

Copestake, A., Furceri, D., & Gonzalez-Dominguez, P. (2023). Crypto market responses to digital asset policies. *Economics Letters*, *222*, 110949. <https://doi.org/https://doi.org/10.1016/j.econlet.2022.110949>

Helmi, M. H., Çatık, A. N., & Akdeniz, C. (2023). The impact of central bank digital currency news on the stock and cryptocurrency markets: Evidence from the TVP-VAR model. *Research in International Business and Finance*, *65*, 101968. <https://doi.org/https://doi.org/10.1016/j.ribaf.2023.101968>

Li, Z., Yang, C., & Huang, Z. (2022). How does the fintech sector react to signals from central bank digital currencies? *Finance Research Letters*, *50*, 103308. <https://doi.org/https://doi.org/10.1016/j.frl.2022.103308>

Mzoughi, H., Benkraiem, R., & Guesmi, K. (2022). The bitcoin market reaction to the launch of central bank digital currencies. *Research in International Business and Finance*, *63*, 101800. <https://doi.org/https://doi.org/10.1016/j.ribaf.2022.101800>

Ozili, P. K. (2023). Central Bank Digital Currency Can Lead to the Collapse of Cryptocurrency. In S. Grima, E. Thalassinos, M. Cristea, M. Kadłubek, D. Maditinos, & L. Peiseniece (Eds.), *Digital Transformation, Strategic Resilience, Cyber Security and Risk Management* (Vol. 111A, pp. 191-198). Emerald Publishing Limited. <https://doi.org/10.1108/S1569-37592023000111A013>

Wang, Y., Lucey, B. M., Vigne, S. A., & Yarovaya, L. (2022). The Effects of Central Bank Digital Currencies News on Financial Markets. *Technological Forecasting and Social Change*, *180*, 121715. <https://doi.org/https://doi.org/10.1016/j.techfore.2022.121715>

Wang, Y., Wei, Y., Lucey, B. M., & Su, Y. (2023). Return spillover analysis across central bank digital currency attention and cryptocurrency markets. *Research in International Business and Finance*, *64*, 101896. <https://doi.org/https://doi.org/10.1016/j.ribaf.2023.101896>

Yousaf, I., & Goodell, J. W. (2023). Linkages between CBDC and cryptocurrency uncertainties, and digital payment stocks. *Finance Research Letters*, *54*, 103765. <https://doi.org/https://doi.org/10.1016/j.frl.2023.103765>
